# Supplementary material for: A Novel Distal Enhancer Mediates Inflammation‐, PTH‐, and Early Onset Murine Kidney Disease‐Induced Expression of the Mouse Fgf23 Gene
Source: PubMed Central journal article supplement (PMC5842943; doi:10.1002/jbm4.10023), 2017-11-21

# Supplementary Figure 1

□ vehicle      ■ LPS

**A.**

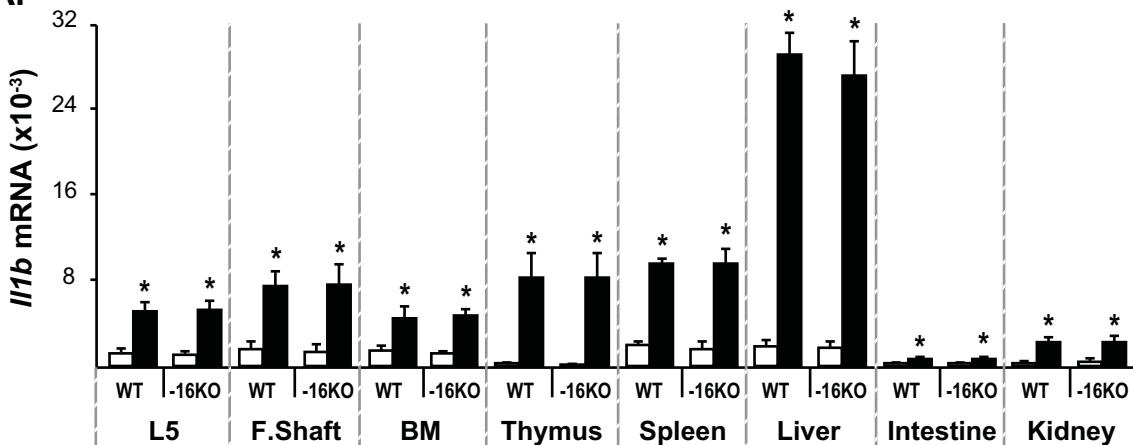

**B.**

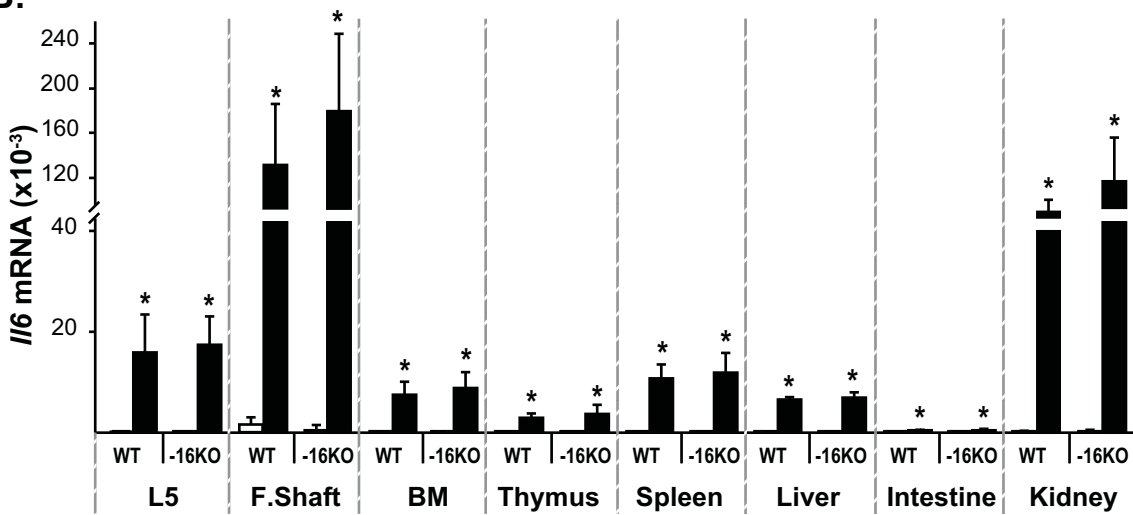

**C.**

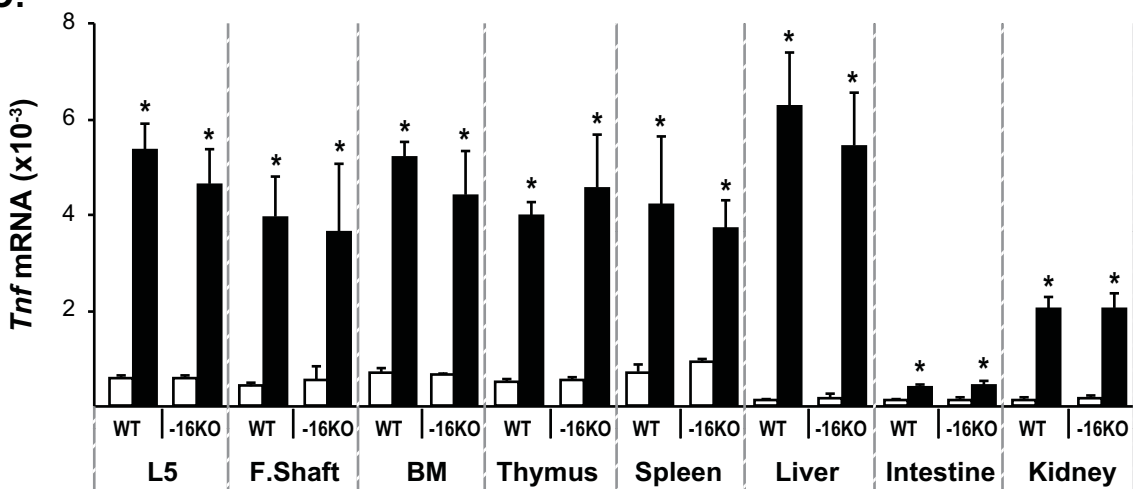

Supplement: NIHMS921828-supplement-Supp_FigS1.pdf [file NIHMS921828-supplement-Supp_FigS1.pdf]
