# Supplementary material for: A Novel Distal Enhancer Mediates Inflammation‐, PTH‐, and Early Onset Murine Kidney Disease‐Induced Expression of the Mouse Fgf23 Gene
Source: PubMed Central journal article supplement (PMC5842943; doi:10.1002/jbm4.10023), 2017-11-21

# Supplementary Figure 2

□ WT      ■ *Fgf23*<sup>-16KO</sup>

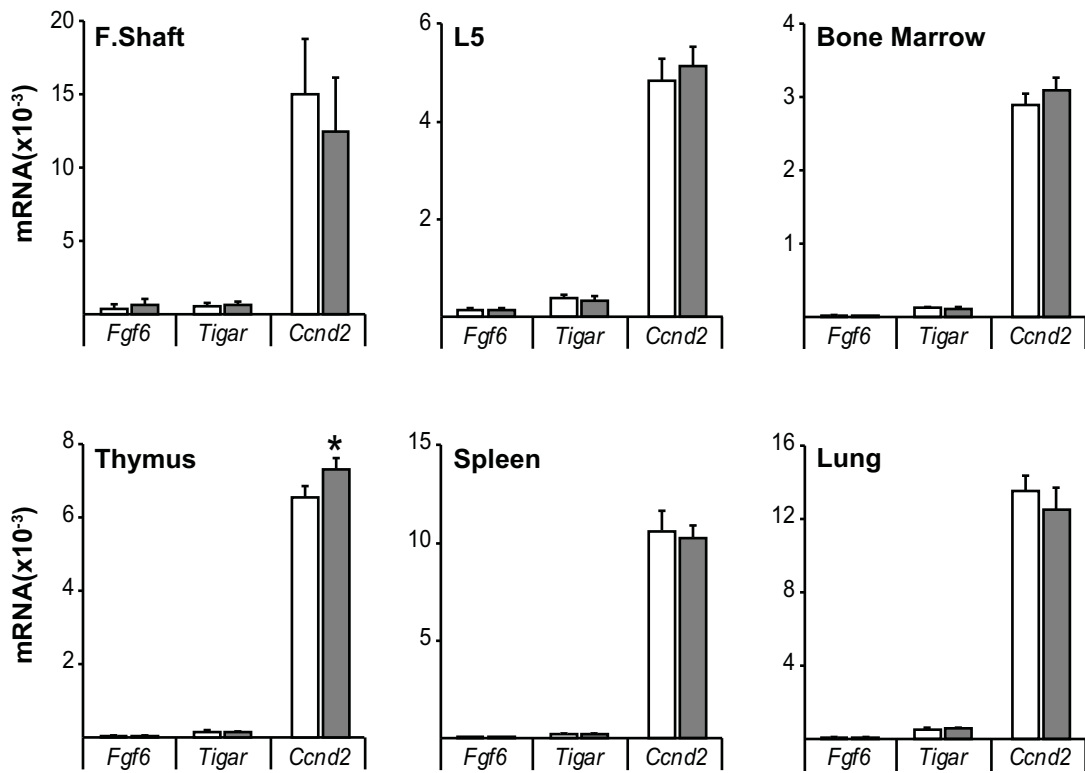

Supplement: NIHMS921828-supplement-Supp_FigS2.pdf [file NIHMS921828-supplement-Supp_FigS2.pdf]
