# Supplementary material for: A Novel Distal Enhancer Mediates Inflammation‐, PTH‐, and Early Onset Murine Kidney Disease‐Induced Expression of the Mouse Fgf23 Gene
Source: PubMed Central journal article supplement (PMC5842943; doi:10.1002/jbm4.10023), 2017-11-21

# Supplementary Figure 4

□ vehicle      ▨ TNF $\alpha$       ▩ IL-1 $\beta$

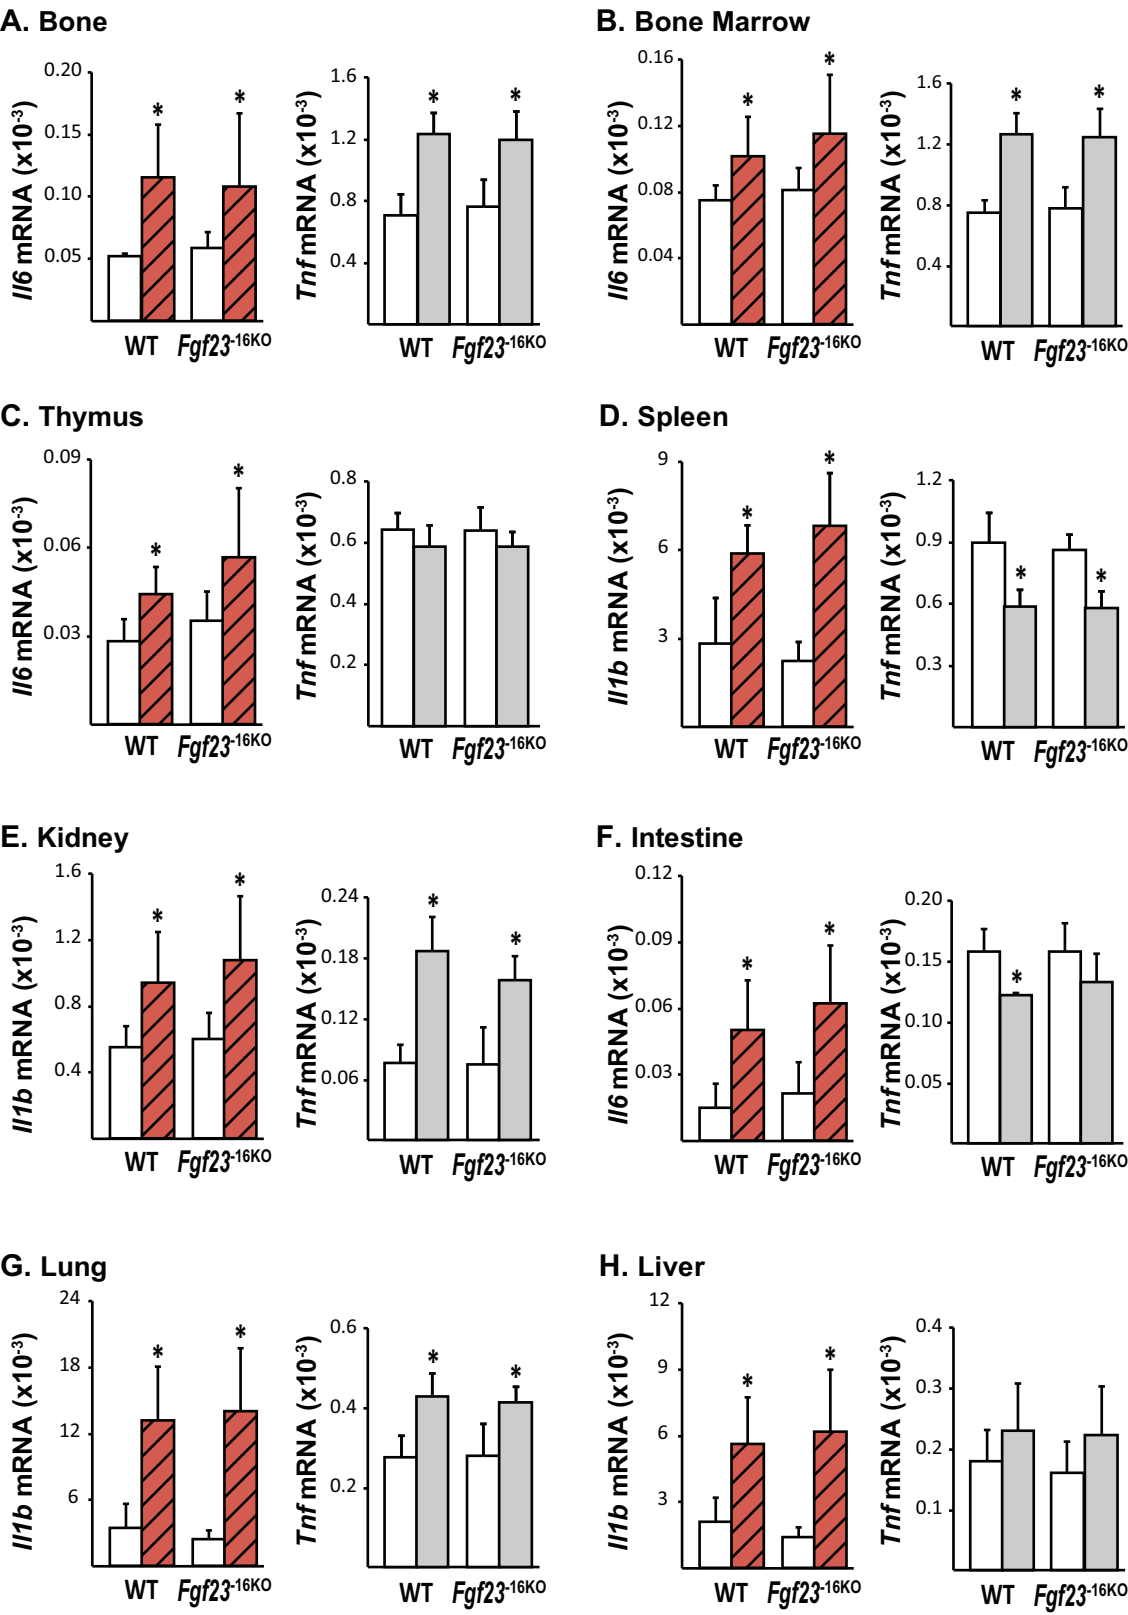

Supplement: NIHMS921828-supplement-Supp_FigS4.pdf [file NIHMS921828-supplement-Supp_FigS4.pdf]
